# Supplementary material
Source: publisher figshare collection journal article supplement (https://karger.figshare.com/ndownloader/files/25736159)
Supplement: Supplementary file 1 [file 25736159]

suppl. Table 1. 102 genes related to the pathogenesis of sICAS

| Gene name | Gene name | Gene name | Gene name | Gene name | Gene name | Gene name |
| --- | --- | --- | --- | --- | --- | --- |
| *ABCA1* | *ARAP1* | *CPS1* | *HNF4A* | *LEPR* | *PLA2G7* | *SLC30A8* |
| *ABI2* | *ARL15* | *CRP* | *HTRA1* | *LPA* | *PON1* | *SMARCA4* |
| *ABO* | *ARNTL* | *CUBN* | *ICAM1* | *LPL* | *PPARG* | *THADA* |
| *ACE* | *BUD13* | *DDAH1* | *IGF1* | *MMP2* | *PRKAA1* | *TNF* |
| *ACOT4* | *CAV1* | *FADS1* | *IGFALS* | *MMP9* | *RARRES2* | *TREX1* |
| *ACTA2* | *CCNL1* | *FAF1* | *IL18* | *MTHFR* | *RBP4* | *VEGFA* |
| *ADIPOQ* | *CDH13* | *FBN1* | *IL6* | *NAMPT* | *RETN* | *WFS1* |
| *ADRB2* | *CDKN2A* | *FTO* | *INS* | *NINJ2* | *RNF213* | *ZADH2* |
| *AGT* | *CDKN2B* | *GCK* | *INSR* | *NOS3* | *SDHAF4* | *ZC3HC1* |
| *ALDH2* | *CETP* | *GCKR* | *ITLN1* | *PCIF1* | *SELE* | *ZFPM1* |
| *APLN* | *CMIP* | *GENE* | *JMJD1C* | *PCSK9* | *SERPINA1* | *ZFPM2* |
| *APOA1* | *COBLL1* | *GNL3* | *KCNJ11* | *PDE4D* | *SERPINE1* | *ZPR1* |
| *APOA5* | *COL18A1* | *HDAC9* | *KCNK16* | *PDE4DIP* | *SH2B3* |  |
| *APOB* | *COL4A1* | *HFE* | *LDLR* | *PEPD* | *SIRT1* |  |
| *APOE* | *CP* | *HNF1A* | *LEP* | *PHACTR1* | *SLC16A11* |  |
